---

Erratum

## **CLUE: exact maximal reduction of kinetic models by constrained lumping of differential equations**

**Alexey Ovchinnikov, Isabel Pérez Verona, Gleb Pogudin and Mirco Tribastone**

---

*Bioinformatics* (2021) doi: 10.1093/bioinformatics/btab010

There were some typographical and formatting errors in the originally published version of this paper. These errors have now been

corrected online. These errors were the fault of the publisher, and the publisher apologises for the errors.
